# Supplementary material for: Telerehabilitation to improve outcomes for people with stroke: study protocol for a randomised controlled trial
Source: PubMed Central journal article supplement (PMC3543302; doi:10.1186/1745-6215-13-233), 2012-12-05
Supplement: 1745-6215-13-233-S1.pdf [file 1745-6215-13-233-S1.pdf]

## Appendix 1 - Menu of exercises - lower limb

### Lower Limb Exercise Chart

Participant ID No: \_\_\_\_\_

Physio Initials: \_\_\_\_\_

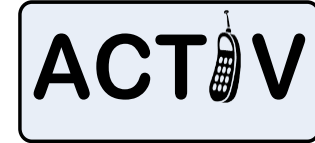

What they want to do most: \_\_\_\_\_  
 \_\_\_\_\_

| Activity          | Visit No: |       |       |        |      | Date: |      |       |        |      | Ph Call No: |       |       |        |      | Date: |       |       |        |      |
|-------------------|-----------|-------|-------|--------|------|-------|------|-------|--------|------|-------------|-------|-------|--------|------|-------|-------|-------|--------|------|
|                   | Time:     | Reps: | Sets: | Speed: | BOS: | Time  | Reps | Sets: | Speed: | BOS: | Time:       | Reps: | Sets: | Speed: | BOS: | Time: | Reps: | Sets: | Speed: | BOS: |
| A. 2 Leg Stand    |           |       |       |        |      |       |      |       |        |      |             |       |       |        |      |       |       |       |        |      |
| B. Sit - Stand    |           |       |       |        |      |       |      |       |        |      |             |       |       |        |      |       |       |       |        |      |
| C. Stepping Task  |           |       |       |        |      |       |      |       |        |      |             |       |       |        |      |       |       |       |        |      |
| D. Step Up        |           |       |       |        |      |       |      |       |        |      |             |       |       |        |      |       |       |       |        |      |
| E. Moving Objects |           |       |       |        |      |       |      |       |        |      |             |       |       |        |      |       |       |       |        |      |
| F. Walking        |           |       |       |        |      |       |      |       |        |      |             |       |       |        |      |       |       |       |        |      |
| G. Turning        |           |       |       |        |      |       |      |       |        |      |             |       |       |        |      |       |       |       |        |      |
| H. Heel Raises    |           |       |       |        |      |       |      |       |        |      |             |       |       |        |      |       |       |       |        |      |
| I. Stair Climb    |           |       |       |        |      |       |      |       |        |      |             |       |       |        |      |       |       |       |        |      |
| J. 1 Leg Stand    |           |       |       |        |      |       |      |       |        |      |             |       |       |        |      |       |       |       |        |      |

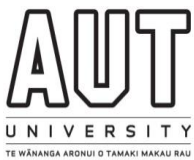

**Examples of altering complexity:**

- Eyes closed
- Accuracy
- Holding an object
- Distance
- Change surface

Not a recommended parameter, however use if required.
