# Supplementary material for: Telerehabilitation to improve outcomes for people with stroke: study protocol for a randomised controlled trial
Source: PubMed Central journal article supplement (PMC3543302; doi:10.1186/1745-6215-13-233), 2012-12-05
Supplement: 1745-6215-13-233-S2.pdf [file 1745-6215-13-233-S2.pdf]

Appendix 2 - Exercise example

**Lower Limb Exercise Sheet**

Exercise B

**SIT TO STAND**

Physio: \_\_\_\_\_

Phone No: \_\_\_\_\_

This exercise works on: \_\_\_\_\_

And helps you improve your: \_\_\_\_\_

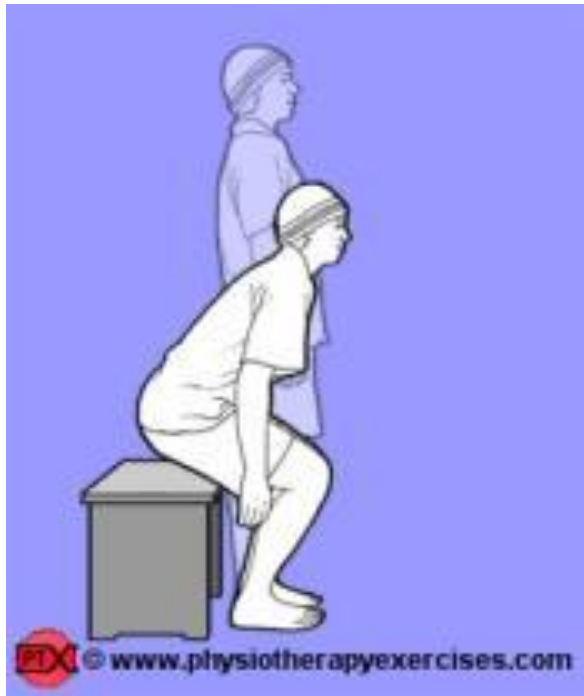

|                   | Visit No: | Phone Call: | Phone Call: |
|-------------------|-----------|-------------|-------------|
| How long:         |           |             |             |
| How many:         |           |             |             |
| How often:        |           |             |             |
| How fast:         |           |             |             |
| How much support: |           |             |             |

Comments: \_\_\_\_\_

\_\_\_\_\_

Try to work at a moderate level of exertion without getting short of breath or fatigued.

**IMPORTANT:**

- Ensure the area around you is clear of unwanted objects
- Always have bare feet or shoes that fit firmly

**STOP if you are in pain!**
